# Supplementary material for: Anti-Inflammatory Activity of Glyceryl 1,3-Distearate Identified from Clinacanthus nutans Extract against Bovine Mastitis Pathogens
Source: MDPI journal article supplement (doi:10.3390/antibiotics12030549), 2023-03-09
Supplement: s1 [file s1]

## Supplementary data

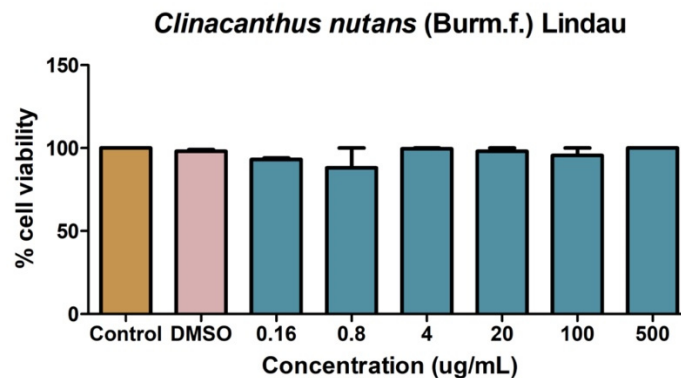

**Figure S1 The cytotoxicity effect of *C. nutans* extract on CPAE cells.** The cells were plated the day prior to the experiment at a density of approximately 7000 cells/well in the 96-well plates. At the time of experiment, the crude extract was prepared in serial concentrations ranged from 0.16-500  $\mu\text{g/mL}$  and added to the CPAE cells (100  $\mu\text{L}$  per well). After 24 hours of treatment, the cells were investigated for the cell viability by using PrestoBLUE™ cell viability reagent. The data was analyzed as the percentage of cell viability where the non-treatment control was set as 100%.

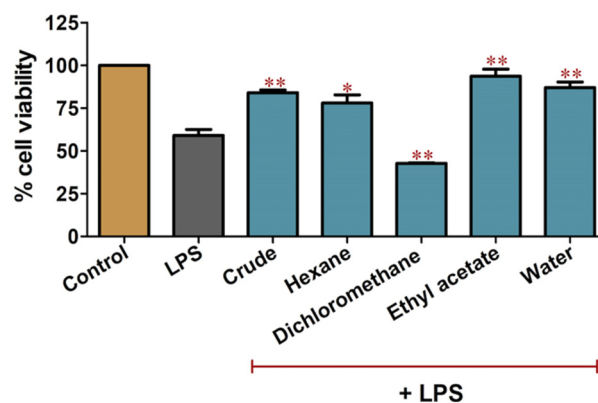

**Figure S2 The effect of *C. nutans* extract fractions to rescue the LPS-induced cell death.** The cells were plated the day prior to the experiment at a density of approximately 7000 cells/well in the 96-well plates. The cell viability after treatment with LPS (10 ng/mL) in the presence or absence of *C. nutans* extract fractions (100  $\mu\text{g/mL}$ ) at 24 hours. After 24 hours of treatment, the cells were investigated for the cell viability by using PrestoBLUE™ cell viability reagent. The data was analyzed as the percentage of cell viability where the non-treatment control was set as 100%.

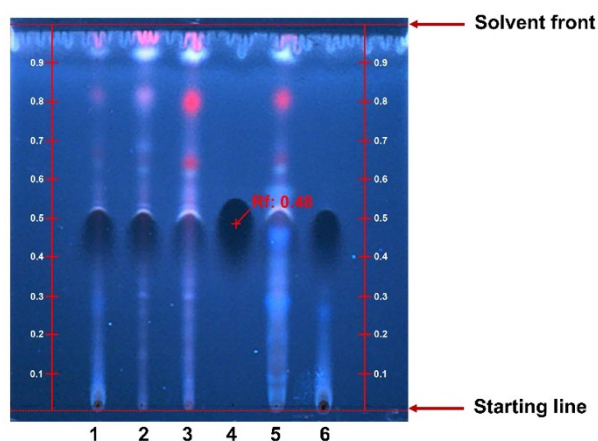

**Figure S3** TLC chromatogram of *C. nutans* fractions (1); hexane fraction (2); dichloromethane fraction (3); glyceryl 1,3 distearate, Rf 0.48 (4); ethyl acetate fraction (5); and water fraction (6) at UV 366 nm.

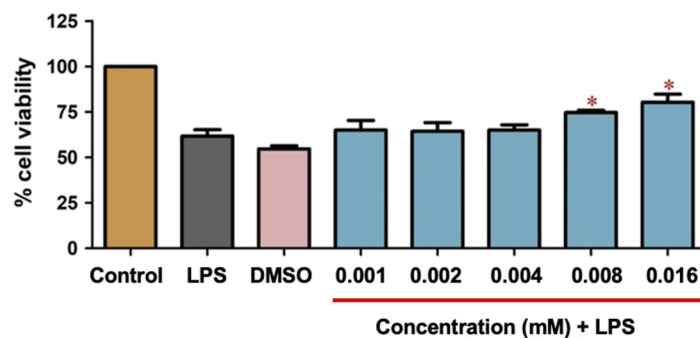

**Figure S4** The effect of glyceryl 1,3 distearate to rescue the LPS-induced cell death and inflammation in CPEA cells. The cells were plated the day prior to the experiment at a density of approximately 7000 cells/well in the 96-well plates. At the time of experiment, LPS (10 ng/mL) was treated to the cells in presence or absence of glyceryl 1,3 distearate was prepared in serial concentrations ranged from 0.001-0.016 mM and added to the CPAE cells (100  $\mu$ L per well). After 24 hours of treatment, the cells were investigated for the cell viability by using PrestoBLUE™ cell viability reagent. The data was analyzed as the percentage of cell viability where the non-treatment control was set as 100%.

**Table S1** Antibacterial activity of glyceryl 1,3-distearate against *E. coli* using agar disc diffusion method. The clear zone was measured and summarized in the table (mean  $\pm$  standard deviation) where the gentamycin was used as the positive control.

| Herb Extract                                            | Clear Zone (mm)  |
|---------------------------------------------------------|------------------|
| <i>Clinacanthus nutans</i> (Burm.f.) Lindau (500 mg/mL) | 7 $\pm$ 0.00     |
| Glyceryl 1,3-distearate (1.6 mM)                        | 0.00             |
| Gentamycin (2 mM)                                       | 20.33 $\pm$ 1.52 |

**Table S2** List of real-time PCR primers.

| Genes                        | Forward primer (5'→3') | Reverse primer (5'→3') |
|------------------------------|------------------------|------------------------|
| <i>IL1<math>\beta</math></i> | GAGGCTGATGGCCCTAAACA   | GTAGGCACTGTTCTCAGCTT   |
| <i>IL6</i>                   | CACCCAGGCAGACTACTTC    | CCCAGATTGGAAGCATCCGT   |
| <i>CXCL3</i>                 | ATACAGAGCGTGAAGGTGACG  | ATGGGAGCTTCAGGGTTGAG   |
| <i>CXCL8</i>                 | ATTCCACACCTTTCCACCCC   | ACCCACTTTTCCTTGGGGTT   |
| <i>GADPH</i>                 | GCTGCCCAAGAATATCATCCCT | GCAGGTCAGATCCACAACAG   |
